# Supplementary material for: Oncogenic transformation of mesenchymal stem cells decreases Nrf2 expression favoring in vivo tumor growth and poorer survival
Source: PubMed Central journal article supplement (PMC4015761; doi:10.1186/1476-4598-13-20), 2014-02-03
Supplement: 1476-4598-13-20-S1.pdf [file 1476-4598-13-20-S1.pdf]

## Supplementary Table S1

| UNIQID      | NAME   | Gene mane                                                      | Accession | Chromosome |
|-------------|--------|----------------------------------------------------------------|-----------|------------|
| 200736_s_at | GPX1   | glutathione peroxidase 1                                       | NM_000581 | 3          |
| 201106_at   | GPX4   | glutathione peroxidase 4 (phospholipid hydroperoxidase)        | NM_002085 | 19         |
| 201348_at   | GPX3   | glutathione peroxidase 3 (plasma)                              | NM_002084 | 5          |
| 202831_at   | GPX2   | glutathione peroxidase 2 (gastrointestinal)                    | NM_002083 | 14         |
| 208028_s_at | GPX5   | glutathione peroxidase 5 (epididymal androgen-related protein) | NM_003996 | 6          |
| 213170_at   | GPX7   | glutathione peroxidase 7                                       | AA406605  | 1          |
| 214091_s_at | GPX3   | glutathione peroxidase 3 (plasma)                              | AW149846  | 5          |
| 214648_at   | GPX5   | glutathione peroxidase 5 (epididymal androgen-related protein) | AI207120  | 6          |
| 215760_s_at | GPX4   | strawberry notch homolog 2 (Drosophila)                        | AC005390  | 19         |
| 239595_at   | GPX2   | glutathione peroxidase 2 (gastrointestinal)                    | AA569032  | 14         |
| 205770_at   | GSR    | glutathione reductase                                          | NM_000637 | 8          |
| 225609_at   | GSR    | glutathione reductase                                          | AI888037  | 8          |
| 237402_at   | GSR    | NA                                                             | H05917    | NA         |
| 208864_s_at | TXN    | thioredoxin                                                    | AF313911  | 9          |
| 216609_at   | TXN    | thioredoxin                                                    | AF065241  | 9          |
| 209078_s_at | TXN2   | thioredoxin 2                                                  | AF276920  | 22         |
| 206662_at   | GLRX   | glutaredoxin (thioltransferase)                                | NM_002064 | 5          |
| 209276_s_at | GLRX   | glutaredoxin (thioltransferase)                                | AF162769  | 5          |
| 219933_at   | GLRX2  | glutaredoxin 2                                                 | NM_016066 | 1          |
| 223342_at   | RRM2B  | ribonucleotide reductase M2 B (TP53 inducible)                 | AB036063  | 8          |
| 201266_at   | TXNRD1 | thioredoxin reductase 1                                        | NM_003330 | 12         |
| 210803_at   | TXNRD2 | thioredoxin reductase 2                                        | AF201385  | 22         |
| 211177_s_at | TXNRD2 | thioredoxin reductase 2                                        | AB019695  | 22         |
| 221906_at   | TXNRD3 | thioredoxin reductase 3                                        | BF513089  | 3          |
| 230880_at   | TXNRD2 | KIAA1652 protein                                               | AW450772  | 22         |
| 231292_at   | TXNRD1 | EP300 interacting inhibitor of differentiation 3               | AI964053  | 12         |
| 59631_at    | TXNRD3 | thioredoxin reductase 3                                        | AI247566  | 3          |
| 201467_s_at | NQO1   | NAD(P)H dehydrogenase, quinone 1                               | AI039874  | 16         |
| 201468_s_at | NQO1   | NAD(P)H dehydrogenase, quinone 1                               | NM_000903 | 16         |
| 203814_s_at | NQO2   | NAD(P)H dehydrogenase, quinone 2                               | NM_000904 | 6          |
| 210519_s_at | NQO1   | NAD(P)H dehydrogenase, quinone 1                               | BC000906  | 16         |
| 200642_at   | SOD1   | superoxide dismutase 1, soluble                                | NM_000454 | 21         |
| 205236_x_at | SOD3   | superoxide dismutase 3, extracellular                          | NM_003102 | 4          |
| 215078_at   | SOD2   | superoxide dismutase 2, mitochondrial                          | AL050388  | 6          |
| 215223_s_at | SOD2   | superoxide dismutase 2, mitochondrial                          | W46388    | 6          |
| 216841_s_at | SOD2   | superoxide dismutase 2, mitochondrial                          | X15132    | 6          |
| 201432_at   | CAT    | catalase                                                       | NM_001752 | 11         |
| 211922_s_at | CAT    | catalase                                                       | AY028632  | 11         |
| 215573_at   | CAT    | catalase                                                       | AU147084  | 11         |
| 206418_at   | NOX1   | NADPH oxidase 1                                                | NM_007052 | X          |
| 207217_s_at | NOX1   | NADPH oxidase 1                                                | NM_013955 | X          |
| 207380_x_at | NOX1   | NADPH oxidase 1                                                | NM_013954 | X          |
| 210808_s_at | NOX1   | NADPH oxidase 1                                                | AF166327  | X          |
| 230399_at   | NOX1   | NA                                                             | AI361034  | NA         |
| 203922_s_at | CYBB   | cytochrome b-245, beta polypeptide                             | AI308863  | X          |
| 203923_s_at | CYBB   | cytochrome b-245, beta polypeptide                             | NM_000397 | X          |
| 217431_x_at | CYBB   | cytochrome b-245, beta polypeptide                             | S67289    | X          |

|              |       |                                                   |           |    |
|--------------|-------|---------------------------------------------------|-----------|----|
| 233538_s_at  | CYBB  | cytochrome b-245, beta polypeptide                | AI203028  | X  |
| 221089_at    | NOX3  | NADPH oxidase 3                                   | NM_015718 | 6  |
| 219773_at    | NOX4  | NADPH oxidase 4                                   | NM_016931 | 11 |
| 1553023_a_at | NOX5  | NADPH oxidase, EF-hand calcium binding domain 5   | NM_024505 | 15 |
| 220641_at    | NOX5  | NADPH oxidase, EF-hand calcium binding domain 5   | NM_024505 | 15 |
| 229352_at    | NOX5  | NA                                                | AA885360  | NA |
| 210301_at    | XDH   | xanthine dehydrogenase                            | U06117    | 2  |
| 241994_at    | XDH   | xanthine dehydrogenase                            | BG260086  | 2  |
| 205082_s_at  | AOX1  | aldehyde oxidase 1                                | AB046692  | 2  |
| 205083_at    | AOX1  | aldehyde oxidase 1                                | NM_001159 | 2  |
| 1560587_s_at | PRDX5 | peroxiredoxin 5                                   | AI718223  | 11 |
| 200844_s_at  | PRDX6 | peroxiredoxin 6                                   | BE869583  | 1  |
| 200845_s_at  | PRDX6 | peroxiredoxin 6                                   | NM_004905 | 1  |
| 201006_at    | PRDX2 | peroxiredoxin 2                                   | NM_005809 | 19 |
| 201619_at    | PRDX3 | peroxiredoxin 3                                   | NM_006793 | 10 |
| 201923_at    | PRDX4 | peroxiredoxin 4                                   | NM_006406 | X  |
| 208680_at    | PRDX1 | peroxiredoxin 1                                   | L19184    | 1  |
| 209766_at    | PRDX3 | peroxiredoxin 3                                   | AF118073  | 10 |
| 211658_at    | PRDX2 | peroxiredoxin 2                                   | L19185    | 19 |
| 215067_x_at  | PRDX2 | peroxiredoxin 2                                   | AU147942  | 19 |
| 222994_at    | PRDX5 | peroxiredoxin 5                                   | AF197952  | 11 |
| 238951_at    | PRDX6 | NA                                                | BF843343  | NA |
| 242751_at    | PRDX6 | NA                                                | N55072    | NA |
| 39729_at     | PRDX2 | peroxiredoxin 2                                   | L19185    | 19 |
| 203665_at    | HMOX1 | heme oxygenase (decycling) 1                      | NM_002133 | 22 |
| 202275_at    | G6PD  | glucose-6-phosphate dehydrogenase                 | NM_000402 | X  |
| 38043_at     | G6PD  | family with sequence similarity 3, member A       | X55448    | X  |
| 201118_at    | PGD   | phosphogluconate dehydrogenase                    | NM_002631 | 1  |
| 1555037_a_at | IDH1  | isocitrate dehydrogenase 1 (NADP+), soluble       | BC012846  | 2  |
| 201193_at    | IDH1  | isocitrate dehydrogenase 1 (NADP+), soluble       | NM_005896 | 2  |
| 242001_at    | IDH1  | isocitrate dehydrogenase 1 (NADP+), soluble       | AA825652  | 2  |
| 242956_at    | IDH1  | isocitrate dehydrogenase 1 (NADP+), soluble       | AA564352  | 2  |
| 210045_at    | IDH2  | isocitrate dehydrogenase 2 (NADP+), mitochondrial | AU151428  | 15 |
| 210046_s_at  | IDH2  | isocitrate dehydrogenase 2 (NADP+), mitochondrial | U52144    | 15 |
| 204058_at    | ME1   | malic enzyme 1, NADP(+)-dependent, cytosolic      | AL049699  | 6  |
| 204059_s_at  | ME1   | malic enzyme 1, NADP(+)-dependent, cytosolic      | NM_002395 | 6  |
| 211204_at    | ME1   | malic enzyme 1, NADP(+)-dependent, cytosolic      | L34035    | 6  |
| 213555_at    | ME1   | RWD domain containing 2A                          | AL049699  | 6  |
| 240788_at    | ME1   | NA                                                | AI076834  | NA |
| 1562612_at   | ME2   | NA                                                | BC020933  | NA |
| 209397_at    | ME2   | malic enzyme 2, NAD(+)-dependent, mitochondrial   | BC000147  | 18 |
| 210153_s_at  | ME2   | malic enzyme 2, NAD(+)-dependent, mitochondrial   | M55905    | 18 |
| 210154_at    | ME2   | malic enzyme 2, NAD(+)-dependent, mitochondrial   | M55905    | 18 |
| 204663_at    | ME3   | malic enzyme 3, NADP(+)-dependent, mitochondrial  | NM_006680 | 11 |
| 231295_at    | ME3   | malic enzyme 3, NADP(+)-dependent, mitochondrial  | BE326351  | 11 |
| 202783_at    | NNT   | nicotinamide nucleotide transhydrogenase          | U40490    | 5  |
| 202784_s_at  | NNT   | nicotinamide nucleotide transhydrogenase          | NM_012343 | 5  |
| 215278_at    | NNT   | NA                                                | AF052090  | NA |
| 238530_at    | NNT   | nicotinamide nucleotide transhydrogenase          | BF695396  | 5  |
| 244531_at    | NNT   | nicotinamide nucleotide transhydrogenase          | BE501279  | 5  |

|              |        |                                                                                       |           |    |
|--------------|--------|---------------------------------------------------------------------------------------|-----------|----|
| 200758_s_at  | NFE2L1 | nuclear factor (erythroid-derived 2)-like 1                                           | AI361227  | 17 |
| 200759_x_at  | NFE2L1 | nuclear factor (erythroid-derived 2)-like 1                                           | NM_003204 | 17 |
| 214179_s_at  | NFE2L1 | nuclear factor (erythroid-derived 2)-like 1                                           | H93013    | 17 |
| 1567013_at   | NFE2L2 | nuclear factor (erythroid-derived 2)-like 2                                           | AF323119  | 2  |
| 1567014_s_at | NFE2L2 | nuclear factor (erythroid-derived 2)-like 2                                           | AF323119  | 2  |
| 1567015_at   | NFE2L2 | nuclear factor (erythroid-derived 2)-like 2                                           | AF323119  | 2  |
| 201146_at    | NFE2L2 | nuclear factor (erythroid-derived 2)-like 2                                           | NM_006164 | 2  |
| 236213_at    | NFE2L2 | NA                                                                                    | AI809760  | NA |
| 203925_at    | GCLM   | glutamate-cysteine ligase, modifier subunit                                           | NM_002061 | 1  |
| 234986_at    | GCLM   | NA                                                                                    | AA630626  | NA |
| 236140_at    | GCLM   | glutamate-cysteine ligase, modifier subunit                                           | AI753488  | 1  |
| 1555330_at   | GCLC   | glutamate-cysteine ligase, catalytic subunit                                          | BC022487  | 6  |
| 202922_at    | GCLC   | glutamate-cysteine ligase, catalytic subunit                                          | BF676980  | 6  |
| 202923_s_at  | GCLC   | glutamate-cysteine ligase, catalytic subunit                                          | NM_001498 | 6  |
| 201415_at    | GSS    | glutathione synthetase                                                                | NM_000178 | 20 |
| 211630_s_at  | GSS    | glutathione synthetase                                                                | L42531    | 20 |
| 209918_at    | GGT2   | NA                                                                                    | J05235    | NA |
| 207131_x_at  | GGT1   | gamma-glutamyltransferase 1                                                           | NM_013430 | 22 |
| 208284_x_at  | GGT1   | gamma-glutamyltransferase 1                                                           | NM_013421 | 22 |
| 209919_x_at  | GGT1   | gamma-glutamyltransferase 1                                                           | L20490    | 22 |
| 211417_x_at  | GGT1   | gamma-glutamyltransferase 1                                                           | L20493    | 22 |
| 215603_x_at  | GGT1   | NA                                                                                    | AI344075  | NA |
| 233837_at    | GGT1   | gamma-glutamyltransferase 1                                                           | AU147678  | 22 |
| 205970_at    | MT3    | metallothionein 3                                                                     | NM_005954 | 16 |
| 203522_at    | CCS    | copper chaperone for superoxide dismutase                                             | NM_005125 | 11 |
| 203028_s_at  | CYBA   | cytochrome b-245, alpha polypeptide                                                   | NM_000101 | 16 |
| 200748_s_at  | FTH1   | ferritin, heavy polypeptide 1                                                         | NM_002032 | 11 |
| 214211_at    | FTH1   | ferritin, heavy polypeptide 1                                                         | AA083483  | 11 |
| 237293_at    | FTH1   | NA                                                                                    | AI808844  | NA |
| 243702_at    | FTH1   | NA                                                                                    | AA722627  | NA |
| 212788_x_at  | FTL    | ferritin, light polypeptide                                                           | BG537190  | 19 |
| 213187_x_at  | FTL    | ferritin, light polypeptide                                                           | BG538564  | 19 |
| 210852_s_at  | AASS   | aminoadipate-semialdehyde synthase                                                    | AF229180  | 7  |
| 214829_at    | AASS   | aminoadipate-semialdehyde synthase                                                    | AK023446  | 7  |
| 1555284_at   | ALS2   | amyotrophic lateral sclerosis 2 (juvenile)                                            | BC029174  | 2  |
| 1560742_at   | ALS2   | NA                                                                                    | AI985407  | NA |
| 1560743_a_at | ALS2   | NA                                                                                    | AI985407  | NA |
| 226291_at    | ALS2   | amyotrophic lateral sclerosis 2 (juvenile)                                            | AB046783  | 2  |
| 232184_at    | ALS2   | amyotrophic lateral sclerosis 2 (juvenile)                                            | AK023024  | 2  |
| 203381_s_at  | APOE   | apolipoprotein E                                                                      | N33009    | 19 |
| 203382_s_at  | APOE   | apolipoprotein E                                                                      | NM_000041 | 19 |
| 212874_at    | APOE   | NA                                                                                    | AI358867  | NA |
| 212883_at    | APOE   | NA                                                                                    | AI358867  | NA |
| 212884_x_at  | APOE   | apolipoprotein E                                                                      | AI358867  | 19 |
| 214627_at    | EPX    | eosinophil peroxidase                                                                 | X14346    | 17 |
| 207347_at    | ERCC6  | excision repair cross-complementing rodent repair deficiency, complementation group 6 | NM_000124 | 10 |
| 1557030_at   | GAB1   | GRB2-associated binding protein 1                                                     | BC030751  | 4  |
| 1560382_at   | GAB1   | GRB2-associated binding protein 1                                                     | AK074381  | 4  |
| 207112_s_at  | GAB1   | GRB2-associated binding protein 1                                                     | NM_002039 | 4  |
| 214987_at    | GAB1   | GRB2-associated binding protein 1                                                     | AL049449  | 4  |

|              |          |                                                           |           |    |
|--------------|----------|-----------------------------------------------------------|-----------|----|
| 225998_at    | GAB1     | GRB2-associated binding protein 1                         | AK022142  | 4  |
| 226002_at    | GAB1     | GRB2-associated binding protein 1                         | AK022142  | 4  |
| 229114_at    | GAB1     | GRB2-associated binding protein 1                         | AW237741  | 4  |
| 242572_at    | GAB1     | NA                                                        | BF435438  | NA |
| 203948_s_at  | MPO      | myeloperoxidase                                           | J02694    | 17 |
| 203949_at    | MPO      | myeloperoxidase                                           | NM_000250 | 17 |
| 1556761_at   | MSRA     | NA                                                        | AI057305  | NA |
| 1556762_a_at | MSRA     | NA                                                        | AI057305  | NA |
| 1559586_at   | MSRA     | hypothetical protein LOC728868                            | BE504795  | 8  |
| 219281_at    | MSRA     | methionine sulfoxide reductase A                          | NM_012331 | 8  |
| 233393_at    | MSRA     | NA                                                        | AU146871  | NA |
| 234435_at    | MSRA     | NA                                                        | AL049349  | NA |
| 234837_at    | MSRA     | NA                                                        | AL049349  | NA |
| 237341_at    | MSRA     | NA                                                        | H98180    | NA |
| 237798_at    | MSRA     | NA                                                        | AI074612  | NA |
| 240031_at    | MSRA     | methionine sulfoxide reductase A                          | AA994467  | 8  |
| 209949_at    | NCF2     | neutrophil cytosolic factor 2                             | BC001606  | 1  |
| 235329_at    | NOXO1    | NADPH oxidase organizer 1                                 | AW083983  | 16 |
| 1554103_at   | PPP1R15B | NA                                                        | BC009873  | NA |
| 224692_at    | PPP1R15B | protein phosphatase 1, regulatory (inhibitor) subunit 15B | BF796046  | 1  |
| 201300_s_at  | PRNP     | prion protein                                             | NM_000311 | 20 |
| 215707_s_at  | PRNP     | prion protein                                             | AV725328  | 20 |
| 222106_at    | PRNP     | prion protein 2 (duplet)                                  | AL133396  | 20 |
| 210342_s_at  | TPO      | thyroid peroxidase                                        | M17755    | 2  |
| 201008_s_at  | TXNIP    | thioredoxin interacting protein                           | AA812232  | 1  |
| 201009_s_at  | TXNIP    | thioredoxin interacting protein                           | AI439556  | 1  |
| 201010_s_at  | TXNIP    | thioredoxin interacting protein                           | NM_006472 | 1  |
| 207349_s_at  | UCP3     | uncoupling protein 3 (mitochondrial, proton carrier)      | NM_022803 | 11 |
| 219827_at    | UCP3     | uncoupling protein 3 (mitochondrial, proton carrier)      | NM_003356 | 11 |
| 205672_at    | XPA      | xeroderma pigmentosum, complementation group A            | NM_000380 | 9  |
| 202723_s_at  | FOXO1A   | forkhead box O1                                           | AW117498  | 13 |
| 202724_s_at  | FOXO1A   | forkhead box O1                                           | NM_002015 | 13 |
| 228484_s_at  | FOXO1A   | forkhead box O1                                           | AI472322  | 13 |
| 232882_at    | FOXO1A   | NA                                                        | AA079839  | NA |
| 239728_at    | FOXO1A   | NA                                                        | AA810830  | NA |
| 241665_x_at  | FOXO1A   | NA                                                        | AI307430  | NA |
| 241667_x_at  | FOXO1A   | NA                                                        | AI820891  | NA |
| 1569477_at   | FOXO3A   | NA                                                        | BC025999  | NA |
| 204131_s_at  | FOXO3A   | forkhead box O3                                           | N25732    | 6  |
| 204132_s_at  | FOXO3A   | NA                                                        | NM_001455 | NA |
| 210655_s_at  | FOXO3A   | NA                                                        | AF041336  | NA |
| 224889_at    | FOXO3A   | forkhead box O3                                           | BE888885  | 6  |
| 224891_at    | FOXO3A   | forkhead box O3                                           | AV725666  | 6  |
| 233629_at    | FOXO3A   | NA                                                        | AK026286  | NA |
| 233674_at    | FOXO3A   | NA                                                        | AK026286  | NA |
| 239923_at    | FOXO3A   | NA                                                        | AI056872  | NA |
| 242320_at    | FOXO3A   | NA                                                        | AI435586  | NA |
| 205451_at    | MLLT7    | forkhead box O4                                           | NM_005938 | X  |
| 218498_s_at  | ERO1L    | ERO1-like (S. cerevisiae)                                 | NM_014584 | 14 |
| 222646_s_at  | ERO1L    | ERO1-like (S. cerevisiae)                                 | AW268365  | 14 |

|              |        |                                                                                       |           |    |
|--------------|--------|---------------------------------------------------------------------------------------|-----------|----|
| 225750_at    | ERO1L  | NA                                                                                    | BE966748  | NA |
| 220012_at    | ERO1LB | ERO1-like beta ( <i>S. cerevisiae</i> )                                               | NM_019891 | 1  |
| 231944_at    | ERO1LB | ERO1-like beta ( <i>S. cerevisiae</i> )                                               | AL045717  | 1  |
| 202201_at    | BLVRB  | biliverdin reductase B (flavin reductase (NADPH))                                     | NM_000713 | 19 |
| 209531_at    | GSTZ1  | glutathione transferase zeta 1                                                        | BC001453  | 14 |
| 232913_at    | GSTZ1  | transmembrane emp24 protein transport domain containing 8                             | AC007954  | 14 |
| 202646_s_at  | UNR    | cold shock domain containing E1, RNA-binding                                          | AA167775  | 1  |
| 219939_s_at  | UNR    | cold shock domain containing E1, RNA-binding                                          | NM_007158 | 1  |
| 222975_s_at  | UNR    | cold shock domain containing E1, RNA-binding                                          | AI423180  | 1  |
| 1553572_a_at | CYGB   | cytoglobin                                                                            | NM_134268 | 17 |
| 1570410_at   | CYGB   | cytoglobin                                                                            | BC018822  | 17 |
| 226632_at    | CYGB   | cytoglobin                                                                            | AL513673  | 17 |
| 1565795_at   | DUOX1  | dual oxidase 1                                                                        | BI768821  | 15 |
| 215800_at    | DUOX1  | dual oxidase 1                                                                        | AL137592  | 15 |
| 219597_s_at  | DUOX1  | dual oxidase 1                                                                        | NM_017434 | 15 |
| 219727_at    | DUOX2  | dual oxidase 2                                                                        | NM_014080 | 15 |
| 1553028_at   | GPR156 | G protein-coupled receptor 156                                                        | NM_153002 | 3  |
| 210682_at    | LPO    | lactoperoxidase                                                                       | U39573    | 17 |
| 201403_s_at  | MGST3  | microsomal glutathione S-transferase 3                                                | NM_004528 | 1  |
| 233307_x_at  | MGST3  | NA                                                                                    | AK000073  | NA |
| 244122_at    | MGST3  | microsomal glutathione S-transferase 3                                                | AA129724  | 1  |
| 214735_at    | PIP3-E | interaction protein for cytohesin exchange factors 1                                  | AW166711  | 6  |
| 241188_at    | PIP3-E | NA                                                                                    | BF223340  | NA |
| 243032_at    | PIP3-E | NA                                                                                    | AI476542  | NA |
| 205127_at    | PTGS1  | prostaglandin-endoperoxide synthase 1 (prostaglandin G/H synthase and cyclooxygenase) | NM_000962 | 9  |
| 205128_x_at  | PTGS1  | prostaglandin-endoperoxide synthase 1 (prostaglandin G/H synthase and cyclooxygenase) | NM_000962 | 9  |
| 215813_s_at  | PTGS1  | prostaglandin-endoperoxide synthase 1 (prostaglandin G/H synthase and cyclooxygenase) | S36219    | 9  |
| 238669_at    | PTGS1  | prostaglandin-endoperoxide synthase 1 (prostaglandin G/H synthase and cyclooxygenase) | BE613133  | 9  |
| 240171_at    | PTGS1  | NA                                                                                    | AW206099  | NA |
| 1554997_a_at | PTGS2  | prostaglandin-endoperoxide synthase 2 (prostaglandin G/H synthase and cyclooxygenase) | AY151286  | 1  |
| 204748_at    | PTGS2  | prostaglandin-endoperoxide synthase 2 (prostaglandin G/H synthase and cyclooxygenase) | NM_000963 | 1  |
| 212012_at    | PXDN   | peroxidasin homolog ( <i>Drosophila</i> )                                             | BF342851  | 2  |
| 212013_at    | PXDN   | peroxidasin homolog ( <i>Drosophila</i> )                                             | D86983    | 2  |
| 241942_at    | PXDNL  | peroxidasin homolog ( <i>Drosophila</i> )-like                                        | AA927870  | 8  |
| 1556043_a_at | TTN    | NA                                                                                    | AK093733  | NA |
| 1557994_at   | TTN    | titin                                                                                 | BF574523  | 2  |
| 1561230_at   | TTN    | NA                                                                                    | BC043155  | NA |
| 208195_at    | TTN    | titin                                                                                 | NM_003319 | 2  |
| 240793_at    | TTN    | titin                                                                                 | BF224054  | 2  |
| 241791_at    | TTN    | titin                                                                                 | BF825274  | 2  |
| 242679_at    | TTN    | NA                                                                                    | AU127120  | NA |
| 242729_at    | TTN    | NA                                                                                    | BE551384  | NA |
| 242771_at    | TTN    | titin                                                                                 | AU149821  | 2  |
| 244839_at    | TTN    | titin                                                                                 | AW975934  | 2  |
| 1565228_s_at | ALB    | albumin                                                                               | D16931    | 4  |
| 211298_s_at  | ALB    | albumin                                                                               | AF116645  | 4  |
| 214837_at    | ALB    | albumin                                                                               | M12523    | 4  |
| 214842_s_at  | ALB    | NA                                                                                    | M12523    | NA |

|              |         |                                                                              |           |    |
|--------------|---------|------------------------------------------------------------------------------|-----------|----|
| 223209_s_at  | SELS    | selenoprotein S                                                              | AF328864  | 15 |
| 1552657_a_at | TXNDC2  | thioredoxin domain containing 2 (spermatzoa)                                 | NM_032243 | 18 |
| 224168_at    | TXNDC2  | thioredoxin domain containing 2 (spermatzoa)                                 | AL136742  | 18 |
| 204961_s_at  | NCF1    | NA                                                                           | NM_000265 | NA |
| 214084_x_at  | NCF1    | neutrophil cytosolic factor 1C pseudogene                                    | AW072388  | 7  |
| 207206_s_at  | ALOX12  | arachidonate 12-lipoxygenase                                                 | NM_000697 | 17 |
| 229833_at    | ALOX12  | NA                                                                           | BF507533  | NA |
| 236433_at    | ALOX12  | NA                                                                           | AW450397  | NA |
| 201065_s_at  | GTF2I   | NA                                                                           | NM_001518 | NA |
| 210891_s_at  | GTF2I   | NA                                                                           | AF035737  | NA |
| 210892_s_at  | GTF2I   | general transcription factor Iii                                             | BC004472  | 7  |
| 215569_at    | GTF2I   | NA                                                                           | AC004883  | NA |
| 229896_at    | GTF2I   | general transcription factor Iii                                             | H41907    | 7  |
| 210037_s_at  | NOS2A   | nitric oxide synthase 2, inducible                                           | L24553    | 17 |
| 224909_s_at  | PREX1   | phosphatidylinositol-3,4,5-trisphosphate-dependent Rac exchange factor 1     | BF308645  | 20 |
| 224925_at    | PREX1   | phosphatidylinositol-3,4,5-trisphosphate-dependent Rac exchange factor 1     | AL445192  | 20 |
| 220811_at    | PRG3    | proteoglycan 3                                                               | NM_006093 | 11 |
| 201848_s_at  | BNIP3   | BCL2/adenovirus E1B 19kDa interacting protein 3                              | U15174    | 10 |
| 201849_at    | BNIP3   | BCL2/adenovirus E1B 19kDa interacting protein 3                              | NM_004052 | 10 |
| 243117_at    | BNIP3   | NA                                                                           | AL038973  | NA |
| 209368_at    | EPHX2   | epoxide hydrolase 2, cytoplasmic                                             | AF233336  | 8  |
| 203466_at    | MPV17   | MpV17 mitochondrial inner membrane protein                                   | NM_002437 | 2  |
| 214199_at    | SFTPD   | surfactant protein D                                                         | NM_003019 | 10 |
| 206423_at    | ANGPTL7 | angiopoietin-like 7                                                          | NM_021146 | 1  |
| 1405_i_at    | CCL5    | chemokine (C-C motif) ligand 5                                               | M21121    | 17 |
| 1555759_a_at | CCL5    | chemokine (C-C motif) ligand 5                                               | AF043341  | 17 |
| 200862_at    | DHCR24  | 24-dehydrocholesterol reductase                                              | NM_014762 | 1  |
| 201041_s_at  | DUSP1   | dual specificity phosphatase 1                                               | NM_004417 | 5  |
| 201044_x_at  | DUSP1   | dual specificity phosphatase 1                                               | AA530892  | 5  |
| 226578_s_at  | DUSP1   | dual specificity phosphatase 1                                               | AW024420  | 5  |
| 202580_x_at  | FOXM1   | forkhead box M1                                                              | NM_021953 | 12 |
| 205900_at    | KRT1    | keratin 1                                                                    | NM_006121 | 12 |
| 207256_at    | MBL2    | mannose-binding lectin (protein C) 2, soluble (opsonic defect)               | NM_000242 | 10 |
| 219786_at    | MTL5    | metallothionein-like 5, testis-specific (tesmin)                             | NM_004923 | 11 |
| 238246_at    | MTL5    | metallothionein-like 5, testis-specific (tesmin)                             | BE467611  | 11 |
| 241466_at    | MTL5    | NA                                                                           | AI275776  | NA |
| 206197_at    | NME5    | non-metastatic cells 5, protein expressed in (nucleoside-diphosphate kinase) | NM_003551 | 5  |
| 204766_s_at  | NUDT1   | nudix (nucleoside diphosphate linked moiety X)-type motif 1                  | NM_002452 | 7  |
| 228231_at    | NUDT1   | NA                                                                           | BE221804  | NA |
| 243135_x_at  | NUDT1   | NA                                                                           | R26456    | NA |
| 218197_s_at  | OXR1    | oxidation resistance 1                                                       | NM_018002 | 8  |
| 222553_x_at  | OXR1    | oxidation resistance 1                                                       | AL541048  | 8  |
| 223879_s_at  | OXR1    | oxidation resistance 1                                                       | AF309387  | 8  |
| 238408_at    | OXR1    | NA                                                                           | AW086258  | NA |
| 238409_x_at  | OXR1    | oxidation resistance 1                                                       | AW086261  | 8  |
| 202696_at    | OXSR1   | oxidative-stress responsive 1                                                | NM_005109 | 3  |
| 208690_s_at  | PDLIM1  | PDZ and LIM domain 1                                                         | BC000915  | 10 |
| 213389_at    | PNKP    | zinc finger protein 592                                                      | BF508616  | 15 |
| 218961_s_at  | PNKP    | polynucleotide kinase 3'-phosphatase                                         | NM_007254 | 19 |
| 218286_s_at  | RNF7    | ring finger protein 7                                                        | NM_014245 | 3  |

|             |        |                                                                                 |           |    |
|-------------|--------|---------------------------------------------------------------------------------|-----------|----|
| 224394_at   | RNF7   | ring finger protein 7                                                           | AF312226  | 3  |
| 224395_s_at | RNF7   | ring finger protein 7                                                           | AF312226  | 3  |
| 224439_x_at | RNF7   | ring finger protein 7                                                           | BC005966  | 3  |
| 239820_at   | RNF7   | ring finger protein 7                                                           | AW593225  | 3  |
| 219416_at   | SCARA3 | scavenger receptor class A, member 3                                            | NM_016240 | 8  |
| 223842_s_at | SCARA3 | scavenger receptor class A, member 3                                            | AB007830  | 8  |
| 223843_at   | SCARA3 | scavenger receptor class A, member 3                                            | AB007830  | 8  |
| 201427_s_at | SEPP1  | selenoprotein P, plasma, 1                                                      | NM_005410 | 5  |
| 229620_at   | SEPP1  | selenoprotein P, plasma, 1                                                      | BE856597  | 5  |
| 231669_at   | SEPP1  | selenoprotein P, plasma, 1                                                      | AV653290  | 5  |
| 242519_at   | SEPP1  | NA                                                                              | BF432331  | NA |
| 213837_at   | SGK2   | l(3)mbt-like (Drosophila)                                                       | Z98752    | 20 |
| 220357_s_at | SGK2   | serum/glucocorticoid regulated kinase 2                                         | NM_016276 | 20 |
| 230573_at   | SGK2   | serum/glucocorticoid regulated kinase 2                                         | AI631895  | 20 |
| 1558331_at  | SIRT2  | sirtuin (silent mating type information regulation 2 homolog) 2 (S. cerevisiae) | BG722779  | 19 |
| 220605_s_at | SIRT2  | sirtuin (silent mating type information regulation 2 homolog) 2 (S. cerevisiae) | NM_012237 | 19 |
| 201314_at   | STK25  | serine/threonine kinase 25 (STE20 homolog, yeast)                               | NM_006374 | 2  |
| 225652_at   | STK25  | NA                                                                              | AA046941  | NA |
| 230768_at   | STK25  | NA                                                                              | BE672541  | NA |
| 237050_at   | STK25  | NA                                                                              | AW207725  | NA |
| 242857_at   | STK25  | NA                                                                              | AA748613  | NA |
| 242932_at   | STK25  | NA                                                                              | AW292329  | NA |
| 203454_s_at | ATOX1  | ATX1 antioxidant protein 1 homolog (yeast)                                      | NM_004045 | 5  |
